# Supplementary material
Source: Royal Society of Chemistry journal article supplement (doi:10.1039/d6gc01096b)
Supplement: d6gc01096b1.pdf [file d6gc01096b1.pdf]

## Soil to Society: Red-Mud-Derived Iron Oxide Electrocatalysts for Circular Nitrogen Upcycling via Green Ammonia production

*Kanhai Kumar,<sup>a</sup> and Karuna Kar Nanda<sup>a,c,e</sup>\**

---

<sup>a</sup>*Materials Research Centre, Indian Institute of Science, Bangalore-560012, India.*

<sup>b</sup>*Homi Bhabha National Institute, Anushaktinagar, Mumbai-400094, India.*

<sup>c</sup>*Institute of Physics, Bhubaneswar-751005, India.*

\*Email: nanda@iisc.ac.in

**Table S1.** Major utilization routes of the Red mud

| Utilization Route                | Processing / Modification                       | Main Application                    | Advantages                               | Limitations                                  | References |
|----------------------------------|-------------------------------------------------|-------------------------------------|------------------------------------------|----------------------------------------------|------------|
| Cement & construction materials  | Mixing with cement clinker, geo-polymerization  | Cement, bricks, concrete            | Large-scale utilization, low cost        | Heavy metal leaching, limited Fe utilization | 1,2        |
| Adsorbents for water treatment   | Acid/alkali activation, calcination             | Removal of phosphate, arsenic, dyes | High surface area, low cost              | Regeneration difficulty                      | 3,4        |
| Catalyst / catalyst support      | Calcination, metal doping                       | Catalysis, environmental reactions  | Utilizes Fe, Al, Ti oxides               | Often requires high temperature treatment    | 3,4        |
| Metal recovery                   | Acid or alkali leaching, solvent extraction     | Fe, Al, Ti, Sc recovery             | Valuable metal extraction                | Chemical waste generation                    | 5–9        |
| Magnetic materials               | Reduction roasting + magnetic separation        | Magnetic particles, ferrites        | High Fe recovery                         | High energy consumption                      | 5,6,9      |
| Soil amendment                   | Neutralization and stabilization                | Agriculture                         | Improves soil structure                  | Alkalinity and toxicity concerns             | 4,10       |
| Pigments                         | Thermal treatment, purification                 | Iron oxide pigments                 | High Fe content useful                   | Color purity issues                          | 4,10–12    |
| Fe–polyphenol (Fe–O–C) framework | Mild acid extraction + tannic acid coordination | Functional Fe–polyphenol material   | Closed-loop extraction, high Fe recovery | Lab scale (Early-stage concept)              | This work  |

**Table S2.** Technologies/strategies developed for the Fe extraction from Red mud

| Route                                        | Leaching / Processing Conditions                     | Fe Recovery                                   | Resource Recyclability              | Product Type                                      | Energy Demand | Circularity        | References       |
|----------------------------------------------|------------------------------------------------------|-----------------------------------------------|-------------------------------------|---------------------------------------------------|---------------|--------------------|------------------|
| Physical recovery Method                     |                                                      |                                               |                                     |                                                   |               |                    |                  |
| Gravity & magnetic separation                | Physical separation, ambient                         | 49–70%                                        | Yes                                 | Iron-rich concentrate                             | Low           | No                 | 9,13–17          |
| Flotation                                    | Starch / oleate collectors, ambient                  | ≤86%                                          | Yes                                 | Iron concentrate                                  | Low           | No                 | 4,6,9,16,17      |
| Hydro cyclone & Magnetic separation          | Magnetic strength - 750 Gauss                        | 60-70%                                        | Yes                                 | Hematite (Fe <sub>2</sub> O <sub>3</sub> content) | High          | Yes                | 7,9,16           |
| Hydrometallurgy & chemical recovery Method   |                                                      |                                               |                                     |                                                   |               |                    |                  |
| H <sub>2</sub> SO <sub>4</sub> leaching      | 2.8 M H <sub>2</sub> SO <sub>4</sub> , 50 °C, 45 min | ~68%                                          | Yes                                 | Fe salts                                          | Medium        | No                 | 15,18            |
| HCl leaching                                 | 10 M HCl, 80 °C, 150 min                             | ~95%                                          | No                                  | Fe salts                                          | High          | No                 | 4,18,19          |
| Oxalic acid leaching                         | 1 M oxalic acid, UV, 75 °C, 2 h                      | >90%                                          | No                                  | Fe oxalates                                       | Medium–High   | No                 | 9,18,19          |
| Bioleaching                                  | Fungal cultures                                      | ~87%                                          | No                                  | Fe ions                                           | Low           | No                 | 14,20            |
| Pyrometallurgy                               |                                                      |                                               |                                     |                                                   |               |                    |                  |
| Carbothermal reduction                       | 1050–1750 °C                                         | High (~80-90%)                                | No <sup>#</sup>                     | Metallic Fe                                       | Very High     | No                 | 9,13,21,22       |
| Reduction Roasting                           | 1100-1550 °C                                         | ~92%                                          | No <sup>#</sup>                     | Metallic Fe                                       | Very High     | No                 | 7,15,21,23       |
| Alkaline carbonates additives                | 1000-1200 °C                                         | ~100%                                         | No <sup>#</sup>                     | Metallic Fe                                       | Very High     | Yes                | 9,13,23,24       |
| Plasma Smelting Technology                   | Graphite & fluxes with power of 35 kW DC             | 71%                                           | No <sup>#</sup>                     | Metallic Fe                                       | Very High     | Yes                | 25               |
| Microwave technology                         | 1000 °C                                              | 88%                                           | No <sup>#</sup>                     | Metallic Fe                                       | Very High     | Yes                | 9,21,26          |
| Suspension magnetization roasting technology | 520 °C                                               | 95.22 %                                       | No <sup>#</sup>                     | Hematite and Goethite                             | Very High     | Yes                | 13,27            |
| <b>Polyphenol-assisted cyclic extraction</b> | Mild HCl + tannic acid, ambient                      | <b>85% (1st cycle)<br/>&gt;99% (3 cycles)</b> | <b>Full acid &amp; ligand reuse</b> | <b>Fe–polyphenol framework</b>                    | <b>Low</b>    | <b>Closed loop</b> | <b>This Work</b> |

<sup>#</sup>Resources like carbon dust, fluxes etc. utilized in Carbothermal reduction methods often consumed

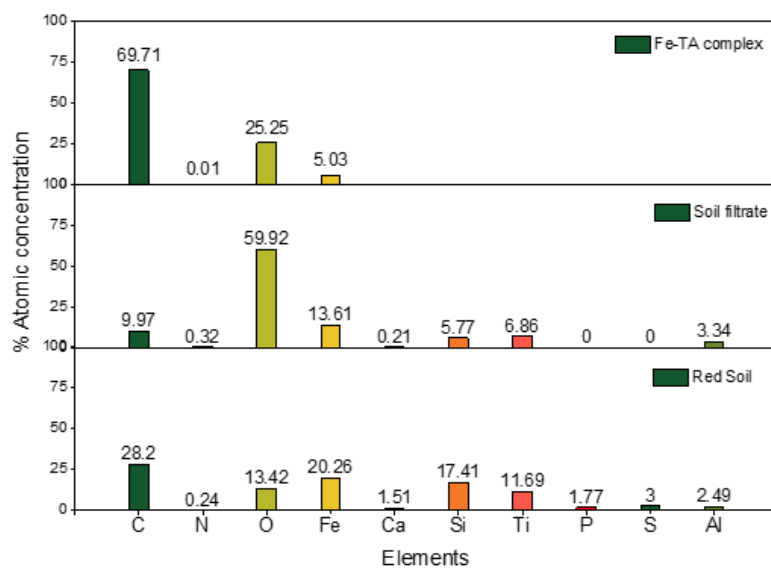

**Figure S1.** Quantification of XPS survey of Fe-TA complex (Black PPT), Soil filtrate and Red Soil (from top to down).

**Table S3.** FTIR Band Assignments for Tannic Acid (TA) and Iron–Tannic Acid Complex (Fe-TA)

| Wavenumber (cm <sup>-1</sup> ) | Notation                                             | Assignment                            | Spectral Significance / Change upon Fe <sup>3+</sup> Coordination                                                                                                                                               |
|--------------------------------|------------------------------------------------------|---------------------------------------|-----------------------------------------------------------------------------------------------------------------------------------------------------------------------------------------------------------------|
| 1696                           | $\nu(\text{C}=\text{O})$                             | Carbonyl stretching                   | Free galloyl ester C=O groups of tannic acid. Weakens upon Fe <sup>3+</sup> complexation, indicating perturbation of the electronic environment around the carbonyl by the metal center.                        |
| 1611                           | $\nu(\text{C}=\text{C})_{Ar}$                        | Aromatic skeletal vibration           | Aromatic ring C=C stretching confirming the polyphenol backbone. Relatively stable across TA and Fe-TA.                                                                                                         |
| 1539                           | $\nu(\text{C}-\text{O})_{Ph}$                        | Phenolate asymmetric stretching       | Primary coordination fingerprint. New or significantly enhanced band in Fe-TA corresponding to deprotonated phenolate groups coordinated to Fe <sup>3+</sup> .                                                  |
| 1442                           | $\delta(\text{O}-\text{H}) / \nu(\text{C}-\text{O})$ | Combined O–H bending / C–O stretching | Symmetric phenolate mode. Intensifies in Fe-TA. The $\Delta\nu \approx 97 \text{ cm}^{-1}$ separation from the 1539 cm <sup>-1</sup> band is diagnostic of bidentate chelation (catecholate-type coordination). |
| 1322                           | $\nu(\text{C}-\text{O})_{Ph}$                        | Phenolic C–O stretching               | Phenolic C–O stretch indicating the formation of the Fe–O(phenolate) interface.                                                                                                                                 |
| 1207 & 1154                    | $\nu(\text{C}-\text{O}-\text{C})$                    | Ester C–O–C / phenolic C–O stretching | Ester linkage and phenolic C–O stretches of TA's gallate arms. Broaden in Fe-TA, consistent with a distribution of slightly different Fe–O–C bond environments across multiple galloyl groups.                  |
| 1009                           | $\nu(\text{C}-\text{O}-\text{C})$                    | Ester/ether C–O–C stretching          | Sharp ester/ether band in TA that weakens and broadens in Fe-TA, suggesting Fe coordination indirectly perturbs the rigidity of gallate arm linkages.                                                           |
| 910                            | $\delta(\text{C}-\text{H})_{oop}$                    | Out-of-plane aromatic C–H bending     | Out-of-plane C–H bending of the galloyl rings. Loses sharp character in Fe-TA due to reduced vibrational freedom upon metal-coordination.                                                                       |
| 849                            | $\omega(\text{C}=\text{C})$                          | Ring wagging / breathing mode         | Aromatic ring breathing or wagging modes. Broadens in Fe-TA reflecting restricted ring motion in the metal-coordinated network.                                                                                 |
| 768                            | $\delta(\text{C}-\text{C})_{oop}$                    | Out-of-plane ring C–C deformation     | Out-of-plane ring deformation mode. Merges into broader features in Fe-TA.                                                                                                                                      |
| 680                            | $\delta(\text{C}-\text{C})_{ip}$                     | In-plane ring C–C deformation         | In-plane ring deformation. Broadens in Fe-TA consistent with network rigidification.                                                                                                                            |
| 643                            | $\nu(\text{Fe}-\text{O})$                            | Metal–oxygen stretching               | Fe–O stretching mode. Intensification in Fe-TA confirms metal–oxygen coordination bond formation.                                                                                                               |

Abbreviations:  $\nu$ , stretching;  $\delta$ , bending;  $\omega$ , wagging; oop, out-of-plane; ip, in-plane; Ph, phenolate; Ar, aromatic.

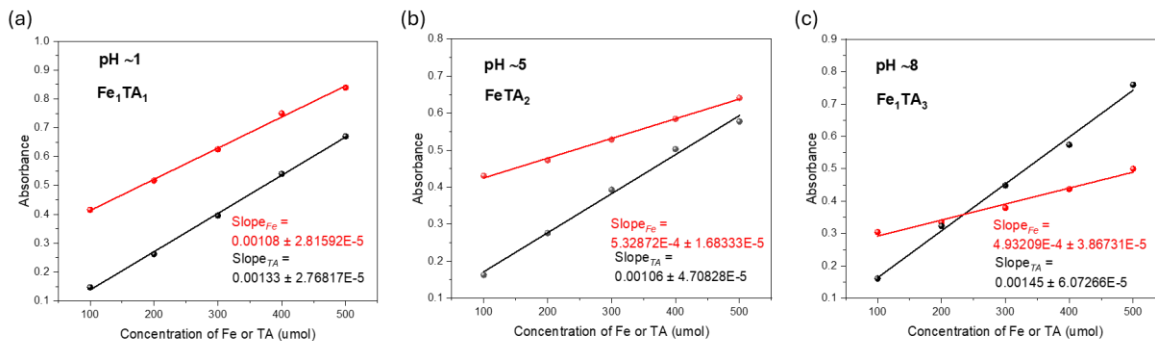

**Figure S2.** Slope-ratio UV-visible analysis for determining the coordination stoichiometry of Fe-tannic acid complexes at different pH values (pH 1, 5, and 8). The linear fitting slopes were used to determine the formation of FeTA, FeTA<sub>2</sub>, and FeTA<sub>3</sub> species.

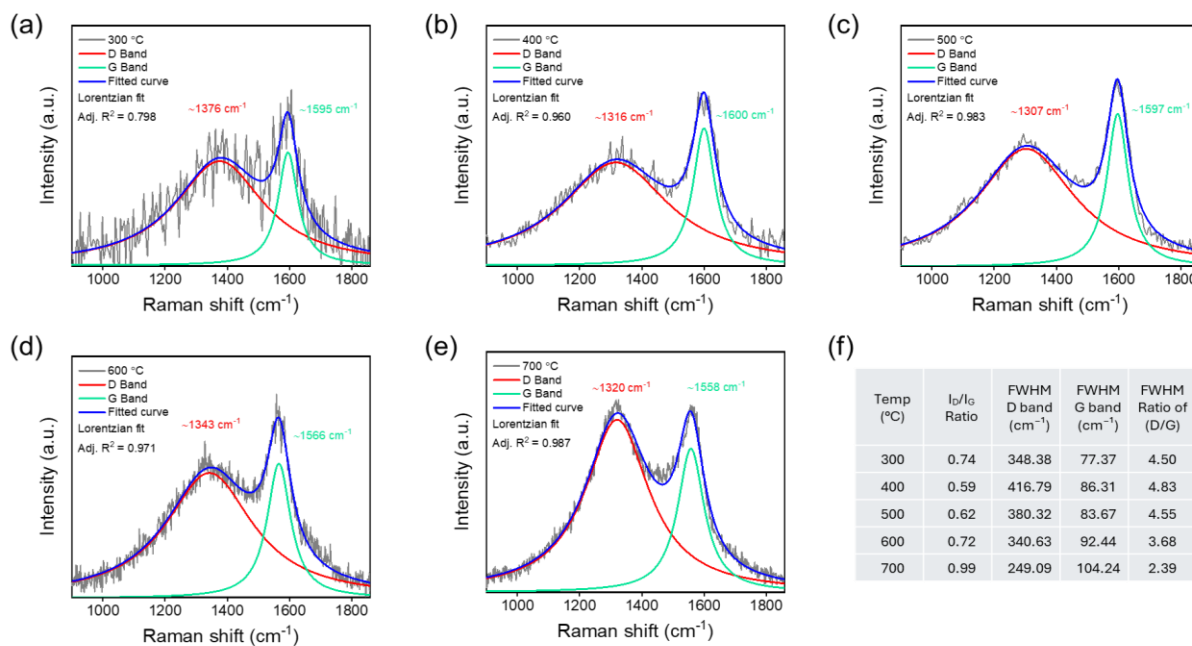

**Figure S3.** Raman spectral deconvolution of Fe-TA precursor pyrolyzed at temperatures ranging from 300 to 700 °C. Each spectrum was deconvoluted into the D band (red, ~1307–1376 cm<sup>-1</sup>, disordered carbon) and G band (green, ~1558–1600 cm<sup>-1</sup>, graphitic sp<sup>2</sup> carbon), with cumulative fit in blue and raw data in grey. Key parameters are summarized in the inset table.

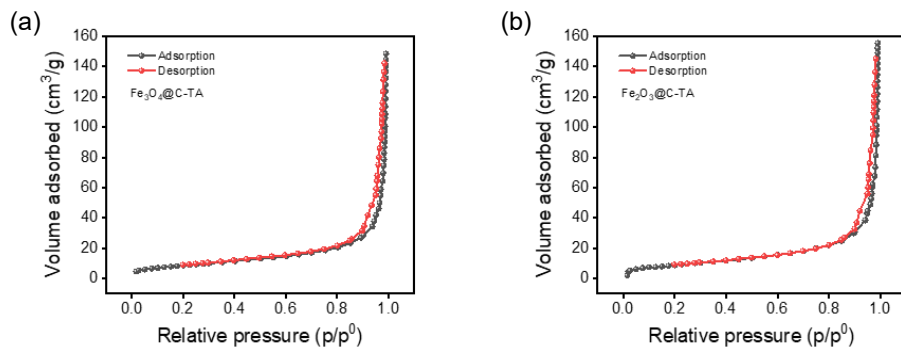

**Figure S4.** Nitrogen adsorption-desorption isotherm curves of (a)  $\text{Fe}_2\text{O}_3@\text{C-TA}$ , (b)  $\text{Fe}_3\text{O}_4@\text{C-TA}$ .

**Table S4:** BET measurement

| Parameter                             | Unit                   | $\text{Fe}_2\text{O}_3@\text{C-TA}$ | $\text{Fe}_3\text{O}_4@\text{C-TA}$ |
|---------------------------------------|------------------------|-------------------------------------|-------------------------------------|
| BET surface area ( $a_{\text{BET}}$ ) | $\text{m}^2/\text{g}$  | 33.675                              | 32.142                              |
| Monolayer volume ( $V_m$ )            | $\text{cm}^3$ (STP)/g  | 7.737                               | 7.385                               |
| BET constant (C)                      | —                      | 46.52                               | 55.596                              |
| Total pore volume                     | $\text{cm}^3/\text{g}$ | 0.2386                              | 0.2253                              |
| Average pore diameter (BET)           | nm                     | 28.344                              | 28.034                              |
| BJH pore volume ( $V_p$ )             | $\text{cm}^3/\text{g}$ | 0.2306                              | 0.209                               |
| BJH peak pore diameter                | nm                     | 1.1903                              | 1.1903                              |
| BJH pore surface area ( $a_p$ )       | $\text{m}^2/\text{g}$  | 43.144                              | 38.053                              |
| BJH average pore diameter             | nm                     | 21.377                              | 21.968                              |
| BJH median pore diameter              | nm                     | 74.729                              | 70.178                              |
| HK micropore volume ( $V_p$ )         | $\text{cm}^3/\text{g}$ | 0.01586                             | 0.01144                             |
| HK peak pore width                    | nm                     | 1.0375                              | 1.0375                              |
| HK micropore area ( $a_p$ )           | $\text{m}^2/\text{g}$  | 20.002                              | 11.923                              |
| HK average pore width                 | nm                     | 1.5861                              | 1.9188                              |
| HK median pore width                  | nm                     | 1.6039                              | 2.1555                              |

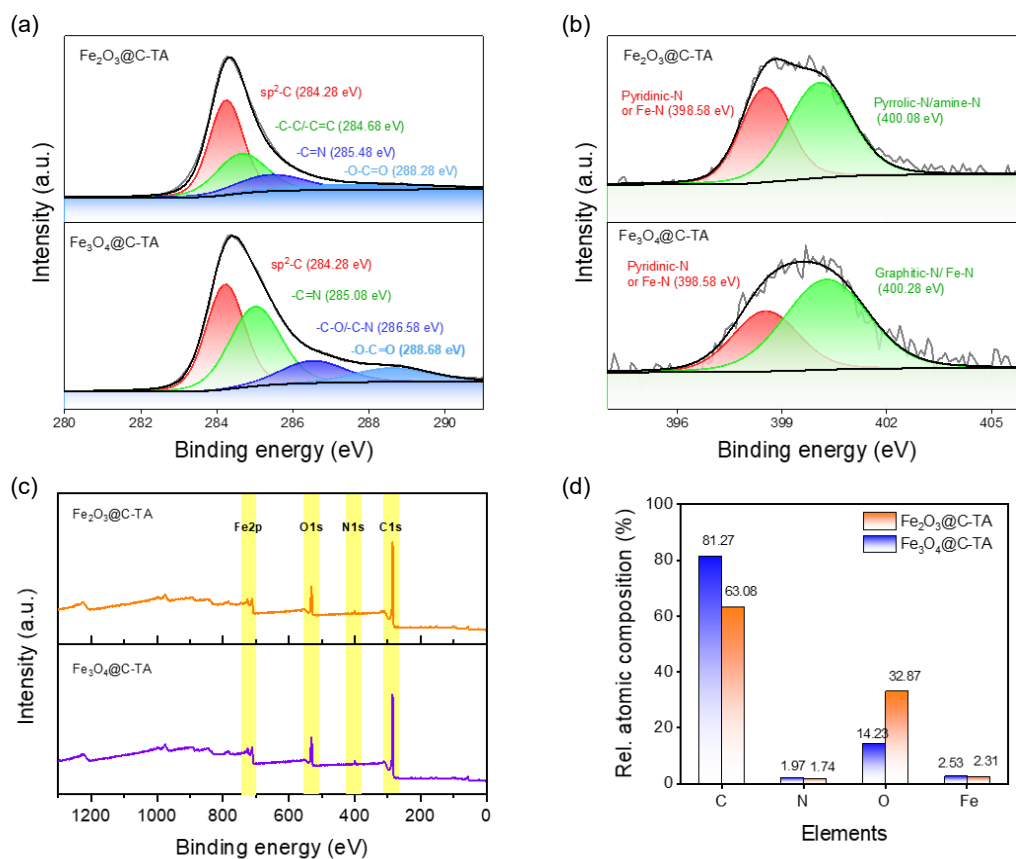

**Figure S5.** (a) High-resolution C 1s XPS spectra of both catalysts showing sp<sup>2</sup>-C, C-N/C=N and O-C=O components. (b) High-resolution N 1s spectra of both catalysts displaying pyridinic-N/Fe-N, pyrrolic/amine-N and graphitic-N/Fe-N species. (c) XPS survey spectra confirming the presence of C, N, O and Fe elements. (d) Relative atomic composition derived from XPS analysis for both samples.

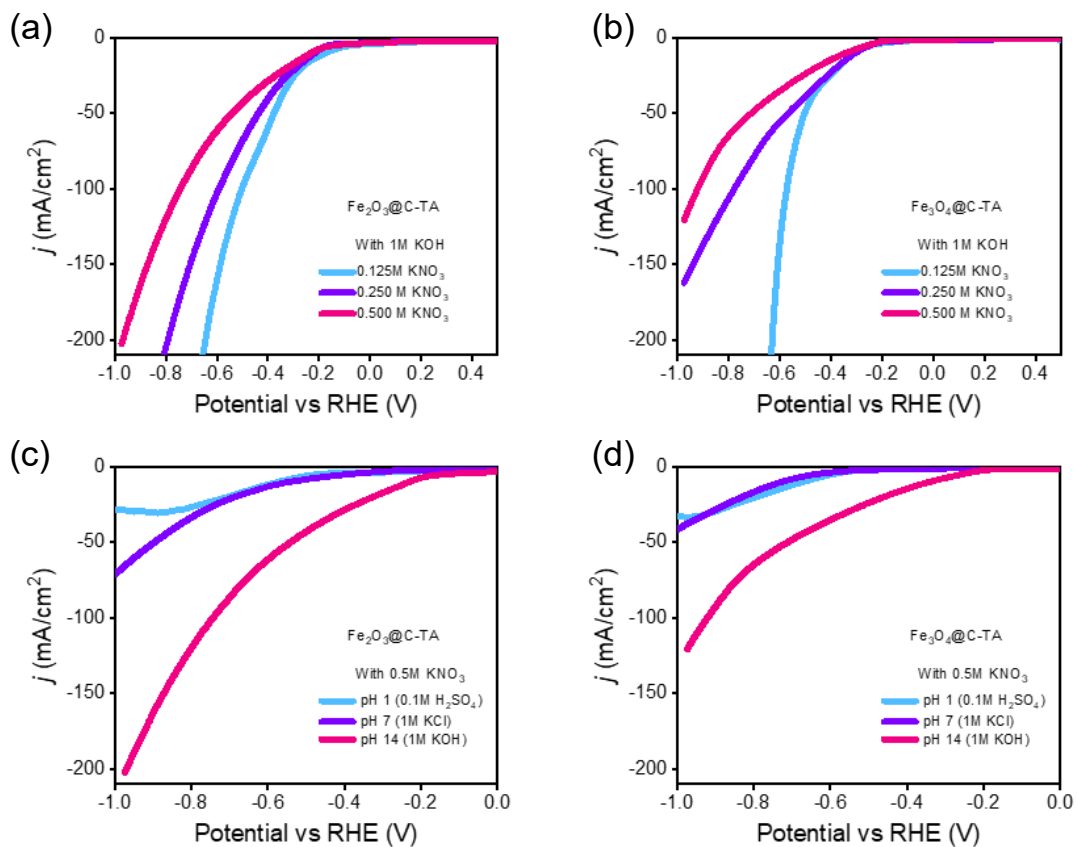

**Figure S6.** LSV curves in 1 M KOH containing varying  $\text{KNO}_3$  concentrations (0.125 M, 0.25 M, and 0.5 M) with 1 M KOH as supporting electrolyte of (a)  $\text{Fe}_2\text{O}_3@\text{C-TA}$  and (b)  $\text{Fe}_3\text{O}_4@\text{C-TA}$  electrodes; LSV curves at varying pH conditions for (c)  $\text{Fe}_2\text{O}_3@\text{C-TA}$  and (d)  $\text{Fe}_3\text{O}_4@\text{C-TA}$  electrodes, demonstrating enhanced  $\text{NO}_3\text{RR}$  activity and steeper cathodic current response at pH 14 (1 M KOH).

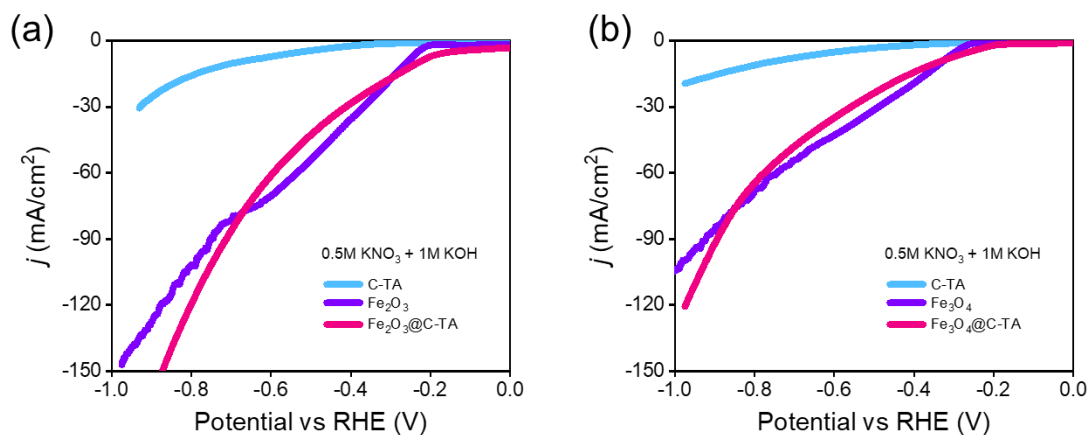

**Figure S7.** LSV curves in 0.5 M  $\text{KNO}_3$  + 1 M  $\text{KOH}$  electrolyte of C-TA,  $\text{Fe}_2\text{O}_3$ , and  $\text{Fe}_2\text{O}_3$ @C-TA electrodes (a), and C-TA,  $\text{Fe}_3\text{O}_4$ , and  $\text{Fe}_3\text{O}_4$ @C-TA electrodes (b), where  $\text{Fe}_2\text{O}_3$  or  $\text{Fe}_3\text{O}_4$  and C-TA were individually studied to elucidate their respective contributions to the enhanced  $\text{NO}_3\text{RR}$  activity observed for the  $\text{Fe}_2\text{O}_3$ @C-TA or  $\text{Fe}_3\text{O}_4$ @C-TA composites respectively.

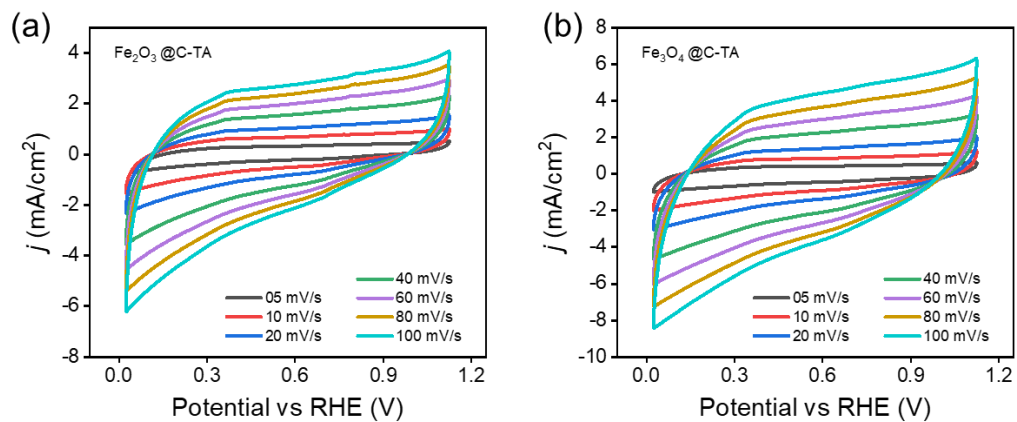

**Figure S8.** Cyclic voltammetry plots: (a)  $\text{Fe}_2\text{O}_3$ @C-TA, and (b)  $\text{Fe}_3\text{O}_4$ @C-TA in non-faradaic region for calculating  $C_{dl}$  and electrochemical surface area (ECSA) taking  $C_s = 50 \mu\text{F}/\text{cm}^2$ .

**Table S5:** Comparison of NO<sub>3</sub>RR activity with recent reports

| S. No. | Catalysts                                     | Electrolytic medium                                                                        | Faradaic efficiency (%) | Potential (V) vs. vs. RHE | Yield rate (mg h <sup>-1</sup> cm <sup>-2</sup> )                                                                       | Ref       |
|--------|-----------------------------------------------|--------------------------------------------------------------------------------------------|-------------------------|---------------------------|-------------------------------------------------------------------------------------------------------------------------|-----------|
| 1.     | Fe-MoS <sub>2</sub>                           | 0.25M of LiNO <sub>3</sub> + 1M LiCl                                                       | ~90                     | -0.85                     | 9.75                                                                                                                    | 28        |
| 2.     | Co <sub>3</sub> O <sub>4</sub> /Co Nanosheets | 0.1 M Na <sub>2</sub> SO <sub>4</sub> + 1 mg mL <sup>-1</sup> KNO <sub>3</sub>             | 88.7                    | -0.8                      | 4.43                                                                                                                    | 29        |
| 3.     | Co-CuO NAs                                    | 0.5 M PBS + 100 mgL <sup>-1</sup>                                                          | 96                      | -0.63                     | 8.41                                                                                                                    | 30        |
| 4.     | Cu-WO <sub>3</sub>                            | 0.1 M KOH + 0.1 M NO <sub>3</sub> <sup>-</sup>                                             | 94                      | -0.63                     | 2.13                                                                                                                    | 31        |
| 5.     | NiCu-SAA                                      | 200 ppm NO <sub>3</sub> <sup>-</sup> + 0.5M K <sub>2</sub> SO <sub>4</sub>                 | ~100                    | -0.55                     | 5.554                                                                                                                   | 32        |
| 6.     | BCN-Cu                                        | 0.1M KOH + 0.1M KNO <sub>3</sub>                                                           | 98.23                   | -0.5                      | 1.900                                                                                                                   | 33        |
| 7.     | Pd/TiO <sub>2</sub>                           | 0.1M LiCl + 0.25M NO <sub>3</sub> <sup>-</sup>                                             | 92.1                    | -0.7                      | 1.12                                                                                                                    | 34        |
| 8.     | Fe/Ni <sub>2</sub> P                          | 0.2M K <sub>2</sub> SO <sub>4</sub> + 0.05M NO <sub>3</sub> <sup>-</sup>                   | 94.3                    | -0.4                      | 4.17                                                                                                                    | 35        |
| 9.     | FeN <sub>2</sub> O <sub>2</sub>               | 0.1M K <sub>2</sub> SO <sub>4</sub> + 0.5M NO <sub>3</sub> <sup>-</sup>                    | 92                      | -0.68                     | 9.2                                                                                                                     | 36        |
| 10.    | Cu/Ni-NC                                      | 0.5 M Na <sub>2</sub> SO <sub>4</sub> + 100 mgL <sup>-1</sup> NO <sub>3</sub> <sup>-</sup> | 97.28                   | -0.7                      | 6.23                                                                                                                    | 37        |
| 11.    | S5-Co <sub>3</sub> O <sub>4</sub>             | 0.1M Na <sub>2</sub> SO <sub>4</sub> + 0.1M NO <sub>3</sub> <sup>-</sup>                   | 89.9                    | -0.6                      | 2.9614                                                                                                                  | 38        |
| 12.    | Ru <sub>20</sub> Ni <sub>80</sub>             | 0.5M K <sub>2</sub> SO <sub>4</sub> + 0.1M NO <sub>3</sub> <sup>-</sup>                    | 98.02                   | -0.35                     | 8.65                                                                                                                    | 39        |
| 13.    | CoTiO <sub>3</sub> @TiO <sub>2</sub> /TM      | 0.1 M NaOH + 200 ppm KNO <sub>3</sub>                                                      | 94.66                   | -0.5                      | 4.24 (-0.8V)                                                                                                            | 40        |
| 14.    | F3CZNB                                        | 1M KOH + 0.1M NO <sub>3</sub> <sup>-</sup>                                                 | 92.3                    | -0.6                      | 5.67                                                                                                                    | 41        |
| 15.    | Au/Cu SAA                                     | 100 ppm NO <sub>3</sub> <sup>-</sup> + 0.5 M Na <sub>2</sub> SO <sub>4</sub>               | 99.69                   | -0.80                     | 3.281                                                                                                                   | 42        |
| 16.    | Cu/Cu <sub>2</sub> O NWA <sub>s</sub>         | 0.5m Na <sub>2</sub> SO <sub>4</sub> + 200 ppm NO <sub>3</sub> <sup>-</sup>                | 95.8                    | -0.85                     | 4.1633                                                                                                                  | 43        |
| 17.    | Cu <sub>1</sub> Co <sub>1</sub> HHTP          | 0.5 M Na <sub>2</sub> SO <sub>4</sub> + 0.1M NaNO <sub>3</sub>                             | 96.4                    | -0.6                      | 5.0983                                                                                                                  | 44        |
| 18.    | Co-Fe@Fe <sub>2</sub> O <sub>3</sub>          | 0.1 M Na <sub>2</sub> SO <sub>4</sub> + 500 mgL <sup>-1</sup> NO <sub>3</sub> <sup>-</sup> | 85.2                    | -0.75                     | 1.506                                                                                                                   | 45        |
| 19.    | Cu-N-C SACs                                   | 0.1M KOH + 0.1M NO <sub>3</sub> <sup>-</sup>                                               | 84.7                    | -1.0                      | 4.5                                                                                                                     | 46        |
| 20.    | RuCu Das/NGA                                  | 0.1M KOH + 0.1M NO <sub>3</sub> <sup>-</sup>                                               | 95.7                    | -0.4                      | 3.1                                                                                                                     | 47        |
| 21.    | NF/Ni <sub>3</sub> N-Cu                       | 1M KOH + 0.1M NO <sub>3</sub> <sup>-</sup>                                                 | 98.7                    | -0.3                      | 1.19                                                                                                                    | 48        |
| 22.    | Pd <sub>63</sub> Cu <sub>37</sub> MSs         | 0.1M KOH + 0.01M NO <sub>3</sub> <sup>-</sup>                                              | 85                      | -0.25                     | 6.1                                                                                                                     | 49        |
| 23.    | NiCu-SA                                       | 0.5M K <sub>2</sub> SO <sub>4</sub> + 200 ppm NO <sub>3</sub> <sup>-</sup>                 | >90                     | -0.5                      | 2.8                                                                                                                     | 50        |
| 24.    | NiCu-SAA <sub>s</sub>                         | 1M KOH + 0.1M NO <sub>3</sub> <sup>-</sup>                                                 | 95.4 ± 2.8              | -0.6                      | 11.4 ± 0.7                                                                                                              | 51        |
| 25.    | Fe <sub>2</sub> O <sub>3</sub> @C-TA          | 0.5M KNO <sub>3</sub> + 1M KOH                                                             | 93.67 ± 1.67            | -0.78                     | 0.863 ± 0.015 mmolh <sup>-1</sup> mg <sub>cat</sub> <sup>-1</sup> (7.352 ± 0.128 mg·h <sup>-1</sup> ·cm <sup>-2</sup> ) | This work |
| 26.    | Fe <sub>3</sub> O <sub>4</sub> @C-TA          | 0.5M KNO <sub>3</sub> + 1M KOH                                                             | 58.66 ± 1.05            | -0.88                     | (2.938 ± 0.051 mg·h <sup>-1</sup> ·cm <sup>-2</sup> )                                                                   | This work |

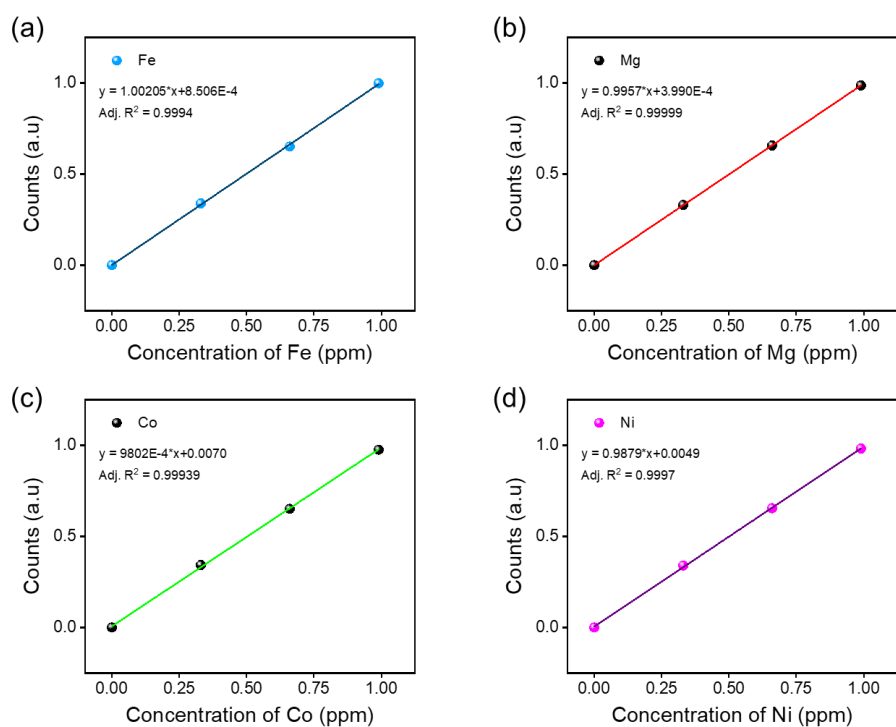

**Figure S9.** Calibration curve utilised for ICP-MS quantification of (a) Fe, (b) Mg, (c) Co and (d) Ni metals.

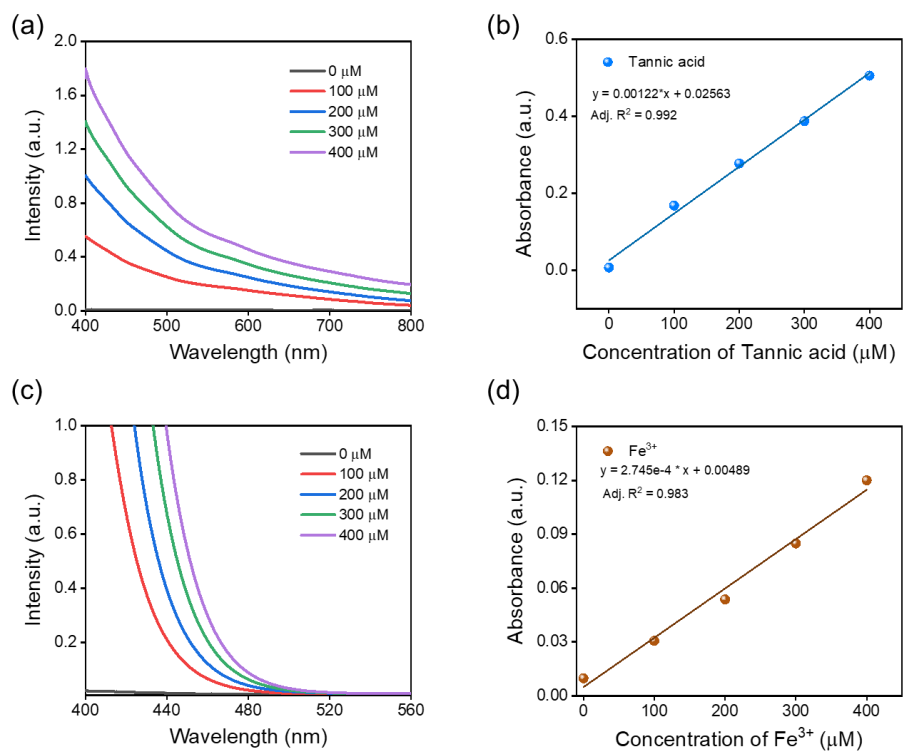

**Figure S10.** UV-Visible calibration curves used for quantification of (a) Tannic acid and (b)  $\text{Fe}^{3+}$ .

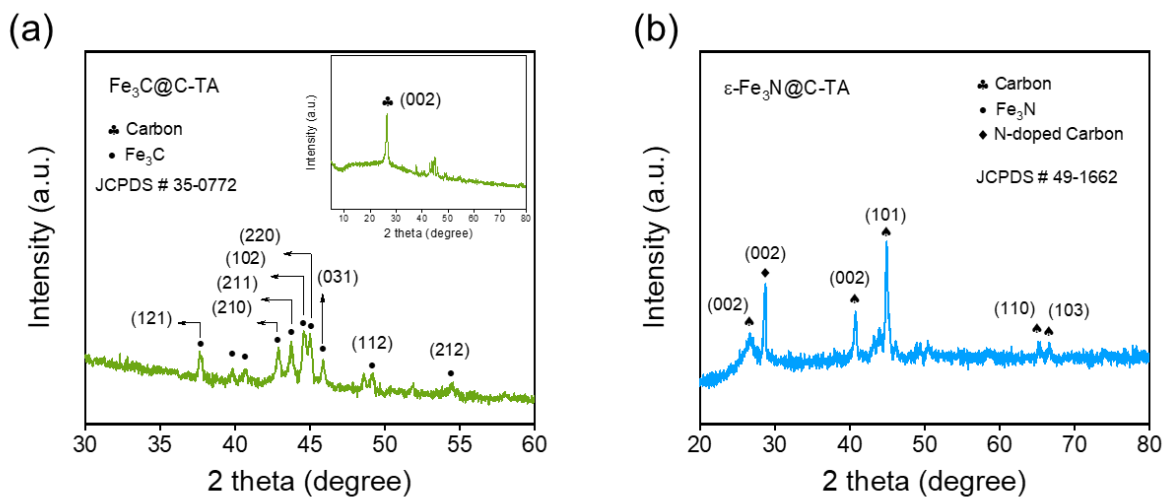

**Figure S11.** XRD spectra showing the phase-pure synthesis of (a)  $\text{Fe}_3\text{C}@C\text{-TA}$  and (b)  $\text{Fe}_3\text{C}@C\text{-TA}$  via catalyst portfolio.

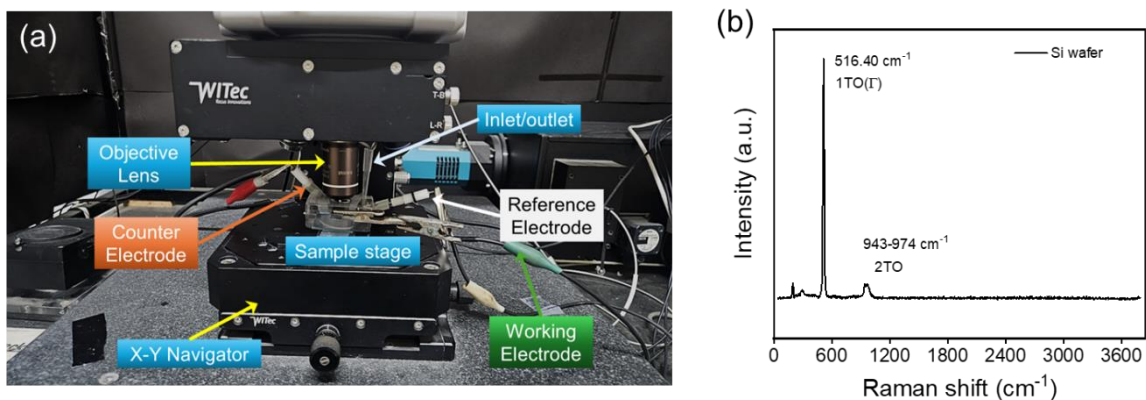

**Figure S12.** (a) Custom-designed *in situ* Raman set up and (b) The Si(100) wafer taken for Raman peak calibration; 1TO( $\Gamma$ ) peak at  $516.40 \text{ cm}^{-1}$  confirms accuracy and reference of spectrometer.

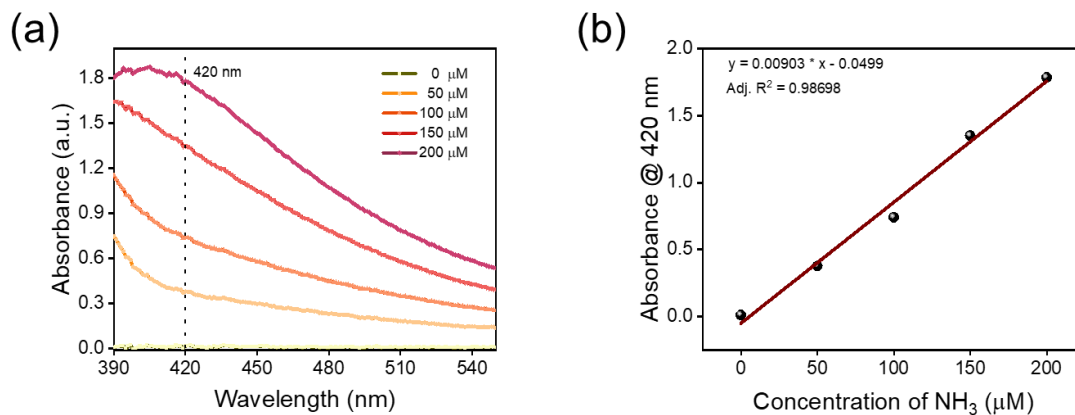

**Figure S13.** UV-visible spectrophotometric calibration curve of  $\text{NH}_4\text{Cl}$  for  $\text{NH}_3$  quantification using Nessler's reagent.

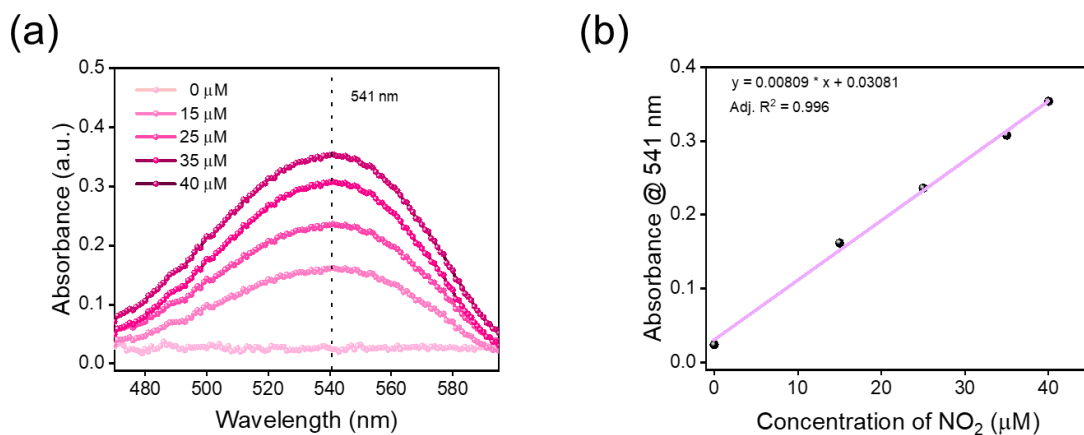

**Figure S14.** UV-visible spectrophotometric calibration curve of  $\text{KNO}_2$  for  $\text{NO}_2^-$  quantification using Griess reagent.

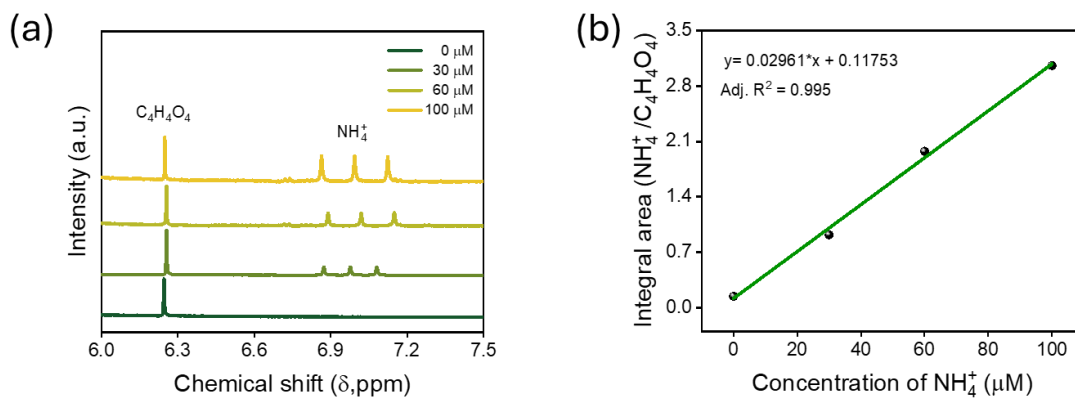

**Figure S15.**  $^1\text{H}$ -NMR spectrophotometric calibration curve of  $\text{NH}_4\text{Cl}$  for  $\text{NH}_4^+$  quantification.

## References:

- 1 P. E. Tsakiridis, S. Agatzini-Leonardou and P. Oustadakis, *J. Hazard. Mater.*, 2004, **116**, 103–110.
- 2 L. Huang, C. Li, H. Wang, X. Li, Y. Qi and X. Zhu, *J. Phys. Conf. Ser.*, 2021, **2009**, 012021.
- 3 Z. Yang, L. Li and Y. Wang, *Molecules*, 2024, **29**, 974.
- 4 Z. Karimi and A. Rahbar-Kelishami, *Sci. Rep.*, 2023, **13**, 8527.
- 5 X. Pan, H. Wu, Z. Lv, H. Yu and G. Tu, *Sci. Total Environ.*, 2023, **904**, 166686.
- 6 D. Valeev, D. Zinoveev, A. Kondratiev, D. Lubyanoi and D. Pankratov, *Metals (Basel)*, 2020, **10**, 32.
- 7 S. Rai, M. T. Nimje, M. J. Chaddha, S. Modak, K. R. Rao and A. Agnihotri, *Miner. Eng.*, 2019, **134**, 222–231.
- 8 C. Laguna, F. González, C. García-Balboa, A. Ballester, M. L. Blázquez and J. A. Muñoz, *Miner. Eng.*, 2011, **24**, 10–18.
- 9 H. Kong, T. Zhou, X. Yang, Y. Gong, M. Zhang and H. Yang, *Energies*, 2022, **15**, 3830.
- 10 J. Li, X. Li, M. Fischel, X. Lin, S. Zhou, L. Zhang, L. Wang and J. Yan, *Toxics*, 2024, **12**, 347.
- 11 Y. Li, J. Wang, X. Wang, B. Wang and Z. Luan, *Phys. C Supercond. its Appl.*, 2011, **471**, 91–96.
- 12 J. Carneiro, D. M. Tobaldi, M. N. Capela, R. M. Novais, M. P. Seabra and J. A. Labrincha, *Waste Manag.*, 2018, **80**, 371–378.
- 13 S. Yuan, X. Liu, P. Gao and Y. Han, *J. Hazard. Mater.*, 2020, **394**, 122579.
- 14 T. C. Eisele and K. L. Gabby, *Miner. Process. Extr. Metall. Rev.*, 2014, **35**, 75–105.
- 15 T. Chun, D. Li, Z. Di, H. Long, L. Tang, F. Li and Y. Li, *J. South. African Inst. Min. Metall.*, 2017, **117**, 361–364.
- 16 L. Jiang, P. Liu, X. Yang, Y. Zhang and F. Li, *Miner. Eng.*, 2019, **131**, 124–130.
- 17 Y. Huang, G. Han, J. Liu and W. Wang, *J. Hazard. Mater.*, 2016, **301**, 46–55.
- 18 Y. Yang, X. Wang, M. Wang, H. Wang and P. Xian, *Int. J. Miner. Process.*, 2016, **157**, 145–151.
- 19 Y. Yang, X. Wang, M. Wang, H. Wang and P. Xian, *Hydrometallurgy*, 2015, **157**, 239–245.
- 20 N. Papassiopi, K. Vaxevanidou and I. Paspaliaris, *Miner. Eng.*, 2010, **23**, 25–31.
- 21 S. Agrawal, V. Rayapudi and N. Dhawan, *Miner. Eng.*, 2019, **132**, 202–210.
- 22 J. Zhao, L. Liu, Y. Yang, D. Liu, X. Peng, S. Liang and L. Jiang, *ACS Sustain. Chem. Eng.*, 2023, **11**, 2468–2475.
- 23 G. Ning, B. Zhang, C. Liu, S. Li, Y. Ye and M. Jiang, *Minerals*, 2018, **8**, 102.
- 24 D. Zinoveev, P. Grudinsky, A. Zakunov, A. Semenov, M. Panova, D. Valeev, A. Kondratiev, V. Dyubanov and A. Petelin, *Metals (Basel)*, 2019, **9**, 1313.
- 25 K. Jayasankar, P. K. Ray, A. K. Chaubey, A. Padhi, B. K. Satapathy and P. S. Mukherjee, *Int. J. Miner. Metall. Mater.*, 2012, **19**, 679–684.
- 26 W. L. Liang, Y. C. Zhang, Y. C. Li, Y. Q. Chang and M. R. Gao, *J. Am. Chem. Soc.*, 2025, **147**, 37223–37230.
- 27 J. Yu, Y. Li, Y. Lv, Y. Han and P. Gao, *Miner. Eng.*, 2022, **178**, 107394.
- 28 X. L. Junyang Ding, Xianghua Hou, Yuan Qiu, Shusheng Zhang, Qian Liu, Jun Luo, *Inorg. Chem. Commun.*,

- 2023, **151**, 110621.
- 29 F. Zhao, G. Hai, X. Li, Z. Jiang and H. Wang, *Chem. Eng. J.*, 2023, **461**, 141960.
- 30 Z. Li, Y. Li, C. Song, L. Fang and F. Yin, 2025, **8**, 2598–2606.
- 31 M. Wu, S. Li, K. Wei, H. Hu, Y. Song, Z. Zheng, H. Li and F. Gao, *Inorg. Chem. Front.*, 2025, **12**, 6631–6639.
- 32 J. Cai, Y. Wei, A. Cao, J. Huang, Z. Jiang, S. Lu and S. Q. Zang, *Appl. Catal. B Environ.*, 2022, **316**, 121683.
- 33 X. Zhao, X. Jia, Y. He, H. Zhang, X. Zhou, H. Zhang, S. Zhang, Y. Dong, X. Hu, A. V. Kuklin, G. V. Baryshnikov, H. Ågren and G. Hu, *Appl. Mater. Today*, 2021, **25**, 101206.
- 34 Y. Guo, R. Zhang, S. Zhang, Y. Zhao, Q. Yang, Z. Huang, B. Dong and C. Zhi, *Energy Environ. Sci.*, 2021, **14**, 3938–3944.
- 35 R. Zhang, Y. Guo, S. Zhang, D. Chen, Y. Zhao, Z. Huang, L. Ma, P. Li, Q. Yang, G. Liang and C. Zhi, *Adv. Energy Mater.*, 2022, **12**, 2103872.
- 36 W. Zhang, H. Dong, L. Zhou, H. Xu, H. Wang, X. Yan, Y. Jiang, J. Zhang and Z. Gu, *Appl. Catal. B Environ.*, 2022, **317**, 121750.
- 37 Yunlong Wang, H. Yin, X. Z. Feng Dong, Y. Qu, L. Wang, Y. Peng, D. Wang, \* Wei Fang and Junhua Li\*, *Small*, 2023, **19**, 2207695.
- 38 Z. Niu, S. Fan, X. Li, J. Yang, J. Wang, Y. Tao and G. Chen, *Chem. Eng. J.*, 2023, **451**, 138890.
- 39 Y. Xiong, M. Sun, S. Wang, Y. Wang, J. Zhou and F. Hao, 2025, **35**, 2420153.
- 40 Y. Wang, W. Zhang, W. Wen, X. Yu, Y. Du, K. Ni, Y. Zhu and M. Zhu, *Adv. Funct. Mater.*, 2023, **33**, 2302651.
- 41 L. Zhou, D. Feng, Z. Li, Z. Lv, H. Li, C. Ge, X. Zhang and T. Ma, *ACS Appl. Mater. Interfaces*, 2025, **17**, 38050–38061.
- 42 H. Yin, Y. Peng and J. Li, *Environ. Sci. Technol.*, 2023, **57**, 3134–3144.
- 43 Y. Wang, W. Zhou, R. Jia, Yifu Yu and B. Zhang, *Angew. Chemie - Int. Ed.*, 2020, **59**, 5350–5354.
- 44 P. Liu, J. Yan, H. Huang and W. Song, *Chem. Eng. J.*, 2023, **466**, 143134.
- 45 S. Zhang, M. Li, J. Li, Q. Song and X. Liu, *Proc. Natl. Acad. Sci. U. S. A.*, 2022, **119**, e2115504119.
- 46 J. Yang, H. Qi, A. Li, X. Liu, X. Yang, S. Zhang, Q. Zhao, Q. Jiang, Y. Su, L. Zhang, J. F. Li, Z. Q. Tian, W. Liu, A. Wang and T. Zhang, *J. Am. Chem. Soc.*, 2022, **144**, 12062–12071.
- 47 K. Liu, Z. Sun, X. Peng, X. Liu, X. Zhang, B. Zhou, K. Yu, Z. Chen, Q. Zhou, F. Zhang, Y. Wang, X. Gao, W. Chen and P. Chen, *Nat. Commun.*, 2025, **16**, 2167.
- 48 X. Ouyang, W. Qiao, Y. Yang, B. Xi, Y. Yu, Y. Wu, J. Fang, P. Li and S. Xiong, *Angew. Chemie - Int. Ed.*, 2025, **64**, e202422585.
- 49 L. Sun, H. Yao, F. Jia, Y. Wang and B. Liu, *Adv. Energy Mater.*, 2023, **13**, 2302274.
- 50 P. Wang, P. Li, Z. Pan, K. Liu, M. Xie, L. Zhou, M. Zhou, G. Yu and Z. Jin, *Nat. Commun.*, 2025, **16**, 5581.
- 51 M. Yi, P. Wang, R. Shi, W. Guo, D. Yang, P. Li, G. Yu and Z. Jin, *Angew. Chemie*, 2026, **138**, e21345.
