# Supplementary material
Source: Royal Society of Chemistry journal article supplement (doi:10.1039/d6gc01096b)
Supplement: d6gc01096b2.pdf [file d6gc01096b2.pdf]

## Supplementary Information Figures

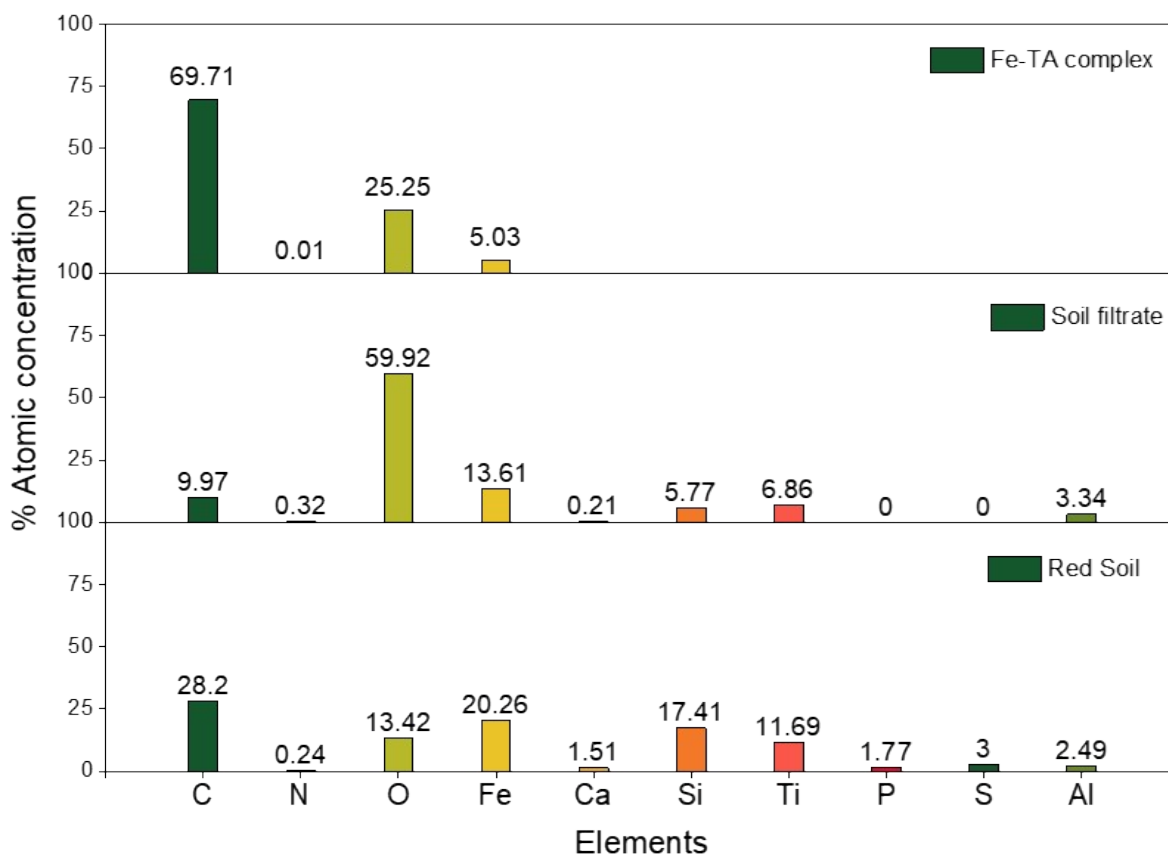

**Figure S1.** Quantification of XPS survey of Fe-TA complex (Black PPT), Soil filtrate and Red Soil (from top to down).

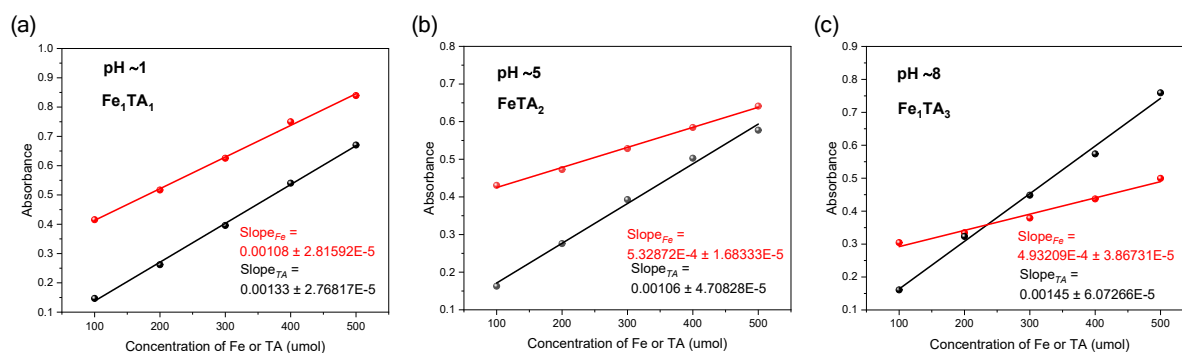

**Figure S2.** Slope-ratio UV-Visible analysis for determining the coordination stoichiometry of Fe-tannic acid complexes at different pH values (pH 1, 5, and 8). The linear fitting slopes were used to determine the formation of  $FeTA$ ,  $FeTA_2$ , and  $FeTA_3$  species.

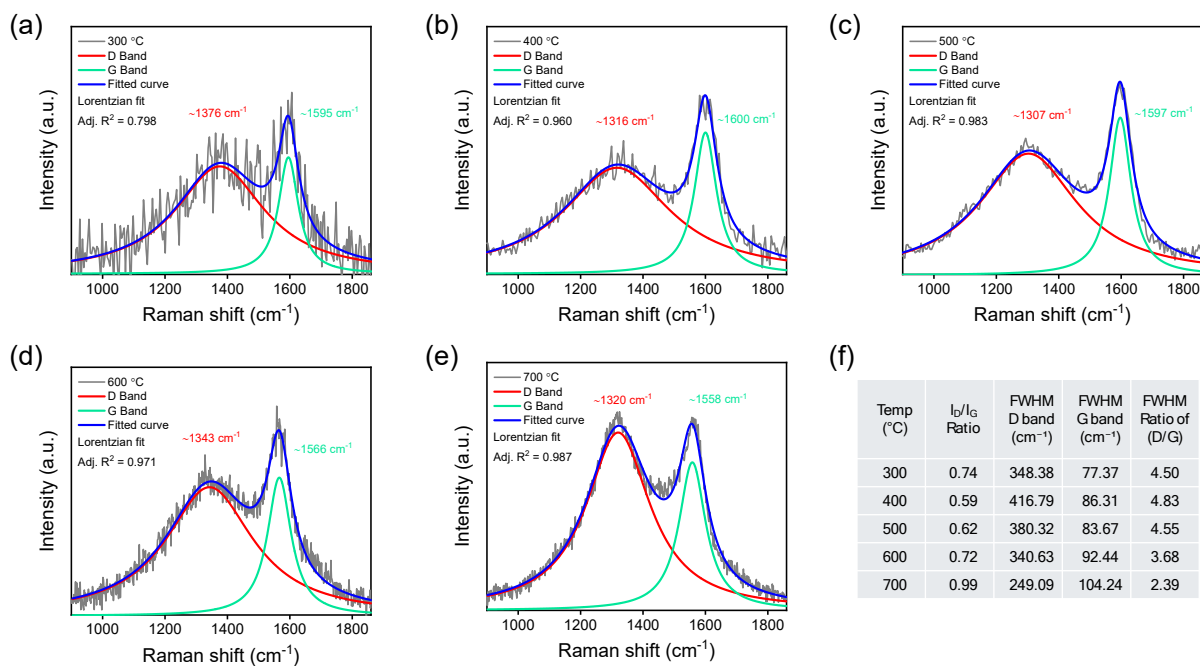

**Figure S3.** Raman spectral deconvolution of Fe-TA precursor pyrolyzed at temperatures ranging from 300 to 700 °C. Each spectrum was deconvoluted into the D band (red, ~1307–1376 cm<sup>-1</sup>, disordered carbon) and G band (green, ~1558–1600 cm<sup>-1</sup>, graphitic sp<sup>2</sup> carbon), with cumulative fit in blue and raw data in grey. Key parameters are summarized in the inset table.

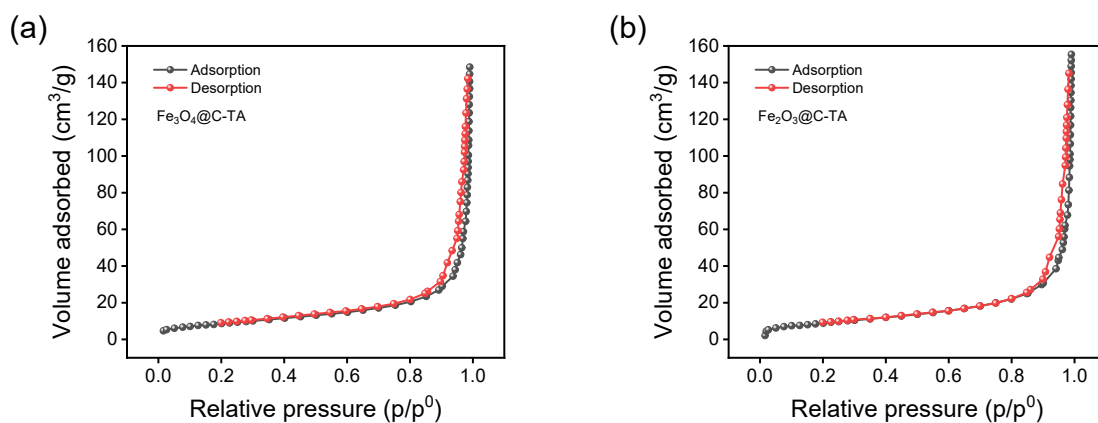

**Figure S4.** Nitrogen adsorption-desorption isotherm curves of (a) Fe<sub>2</sub>O<sub>3</sub>@C-TA, (b) Fe<sub>3</sub>O<sub>4</sub>@C-TA.

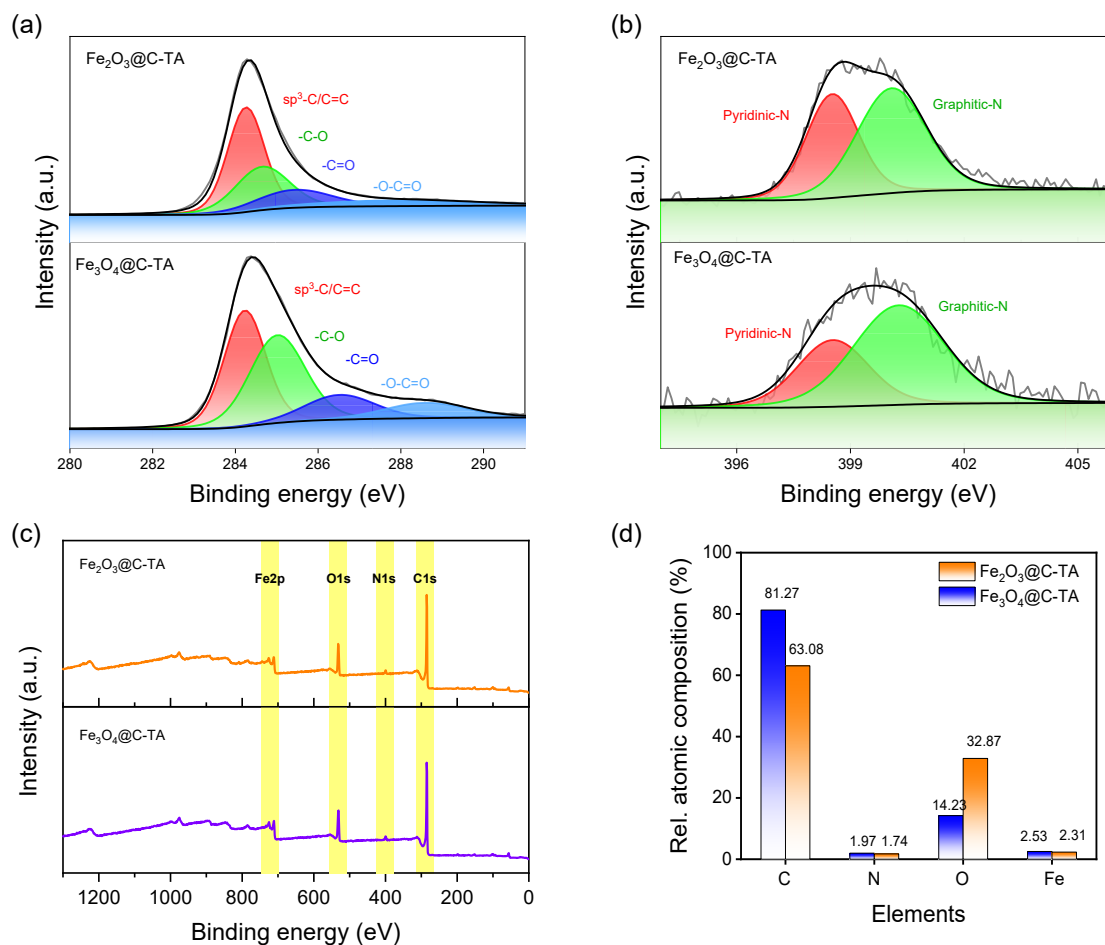

**Figure S5.** (a) High-resolution C 1s XPS spectra of both catalysts showing sp<sup>2</sup>-C, C–N/C=N and O–C=O components. (b) High-resolution N 1s spectra of both catalysts displaying pyridinic-N/Fe–N, pyrrolic/amine-N and graphitic-N/Fe–N species. (c) XPS survey spectra confirming the presence of C, N, O and Fe elements. (d) Relative atomic composition derived from XPS analysis for both samples.

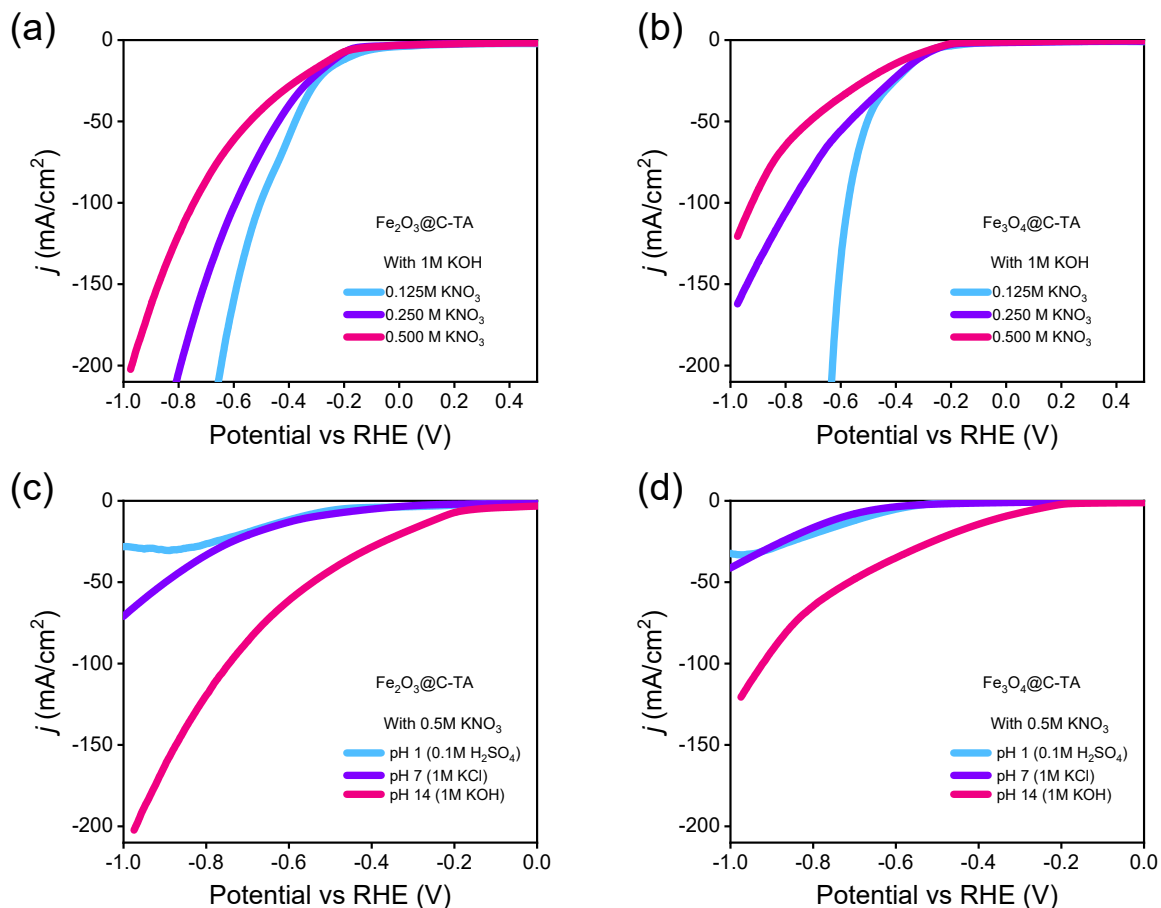

**Figure S6.** LSV curves in 1 M KOH containing varying KNO<sub>3</sub> concentrations (0.125 M, 0.25 M, and 0.5 M) with 1 M KOH as supporting electrolyte of (a) Fe<sub>2</sub>O<sub>3</sub>@C-TA and (b) Fe<sub>3</sub>O<sub>4</sub>@C-TA electrodes; LSV curves at varying pH conditions for (c) Fe<sub>2</sub>O<sub>3</sub>@C-TA and (d) Fe<sub>3</sub>O<sub>4</sub>@C-TA electrodes, demonstrating enhanced NO<sub>3</sub>RR activity and steeper cathodic current response at pH 14 (1 M KOH).

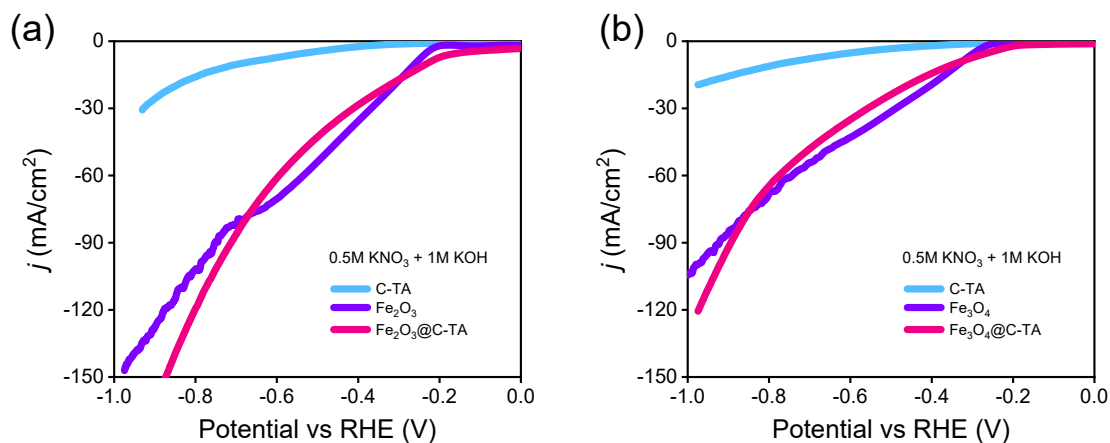

**Figure S7.** LSV curves in 0.5 M KNO<sub>3</sub> + 1 M KOH electrolyte of C-TA, Fe<sub>2</sub>O<sub>3</sub>, and Fe<sub>2</sub>O<sub>3</sub>@C-TA electrodes (a), and C-TA, Fe<sub>3</sub>O<sub>4</sub>, and Fe<sub>3</sub>O<sub>4</sub>@C-TA electrodes (b), where Fe<sub>2</sub>O<sub>3</sub> or Fe<sub>3</sub>O<sub>4</sub> and C-TA were individually studied to elucidate their respective contributions to the enhanced NO<sub>3</sub>RR activity observed for the Fe<sub>2</sub>O<sub>3</sub>@C-TA or Fe<sub>3</sub>O<sub>4</sub>@C-TA composites respectively.

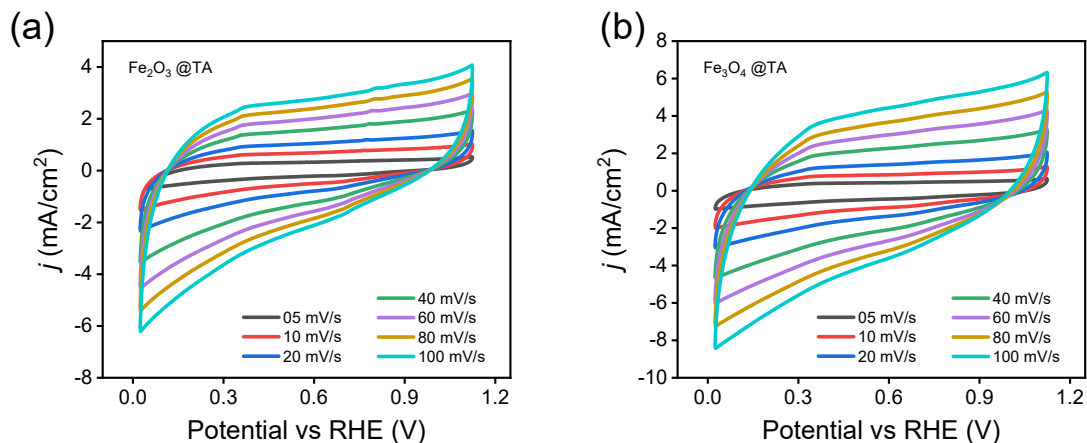

**Figure S8.** Cyclic voltammograms: (a) Fe<sub>2</sub>O<sub>3</sub>@C-TA, and (b) Fe<sub>3</sub>O<sub>4</sub>@C-TA in non-faradaic region for calculating  $C_{dl}$  and electrochemical surface area (ECSA) taking  $C_s = 50 \mu\text{F}/\text{cm}^2$ .

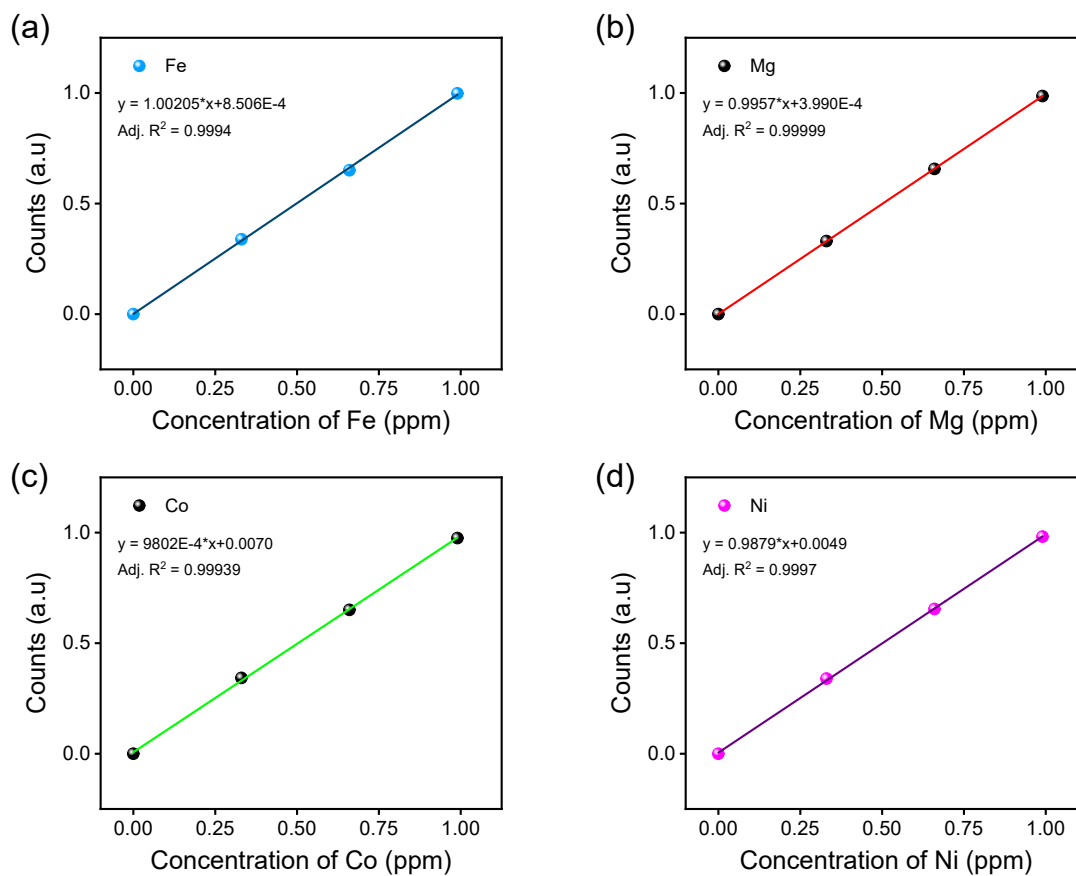

**Figure S9.** Calibration curve utilised for ICP-MS quantification of (a) Fe, (b) Mg, (c) Co and (d) Ni metals.

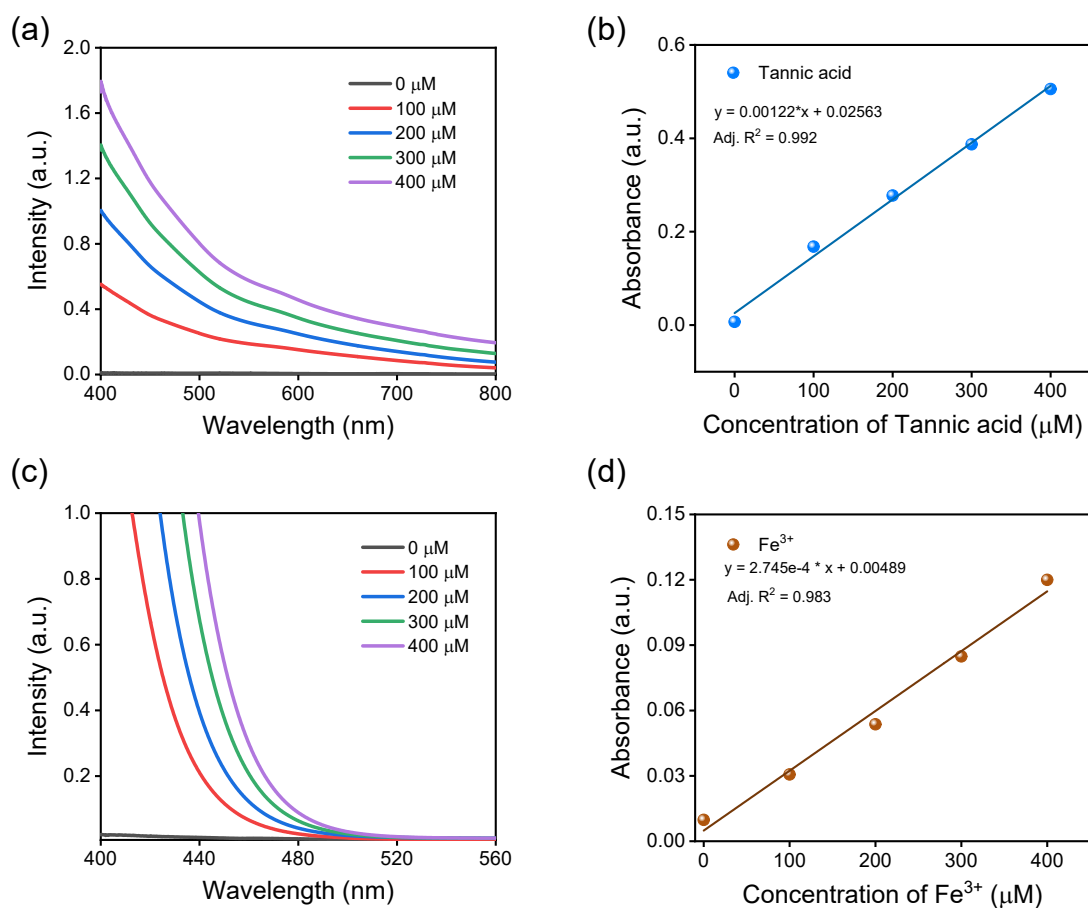

**Figure S10.** UV-Visible calibration curves used for quantification of (a) Tannic acid and (b)  $\text{Fe}^{3+}$ .

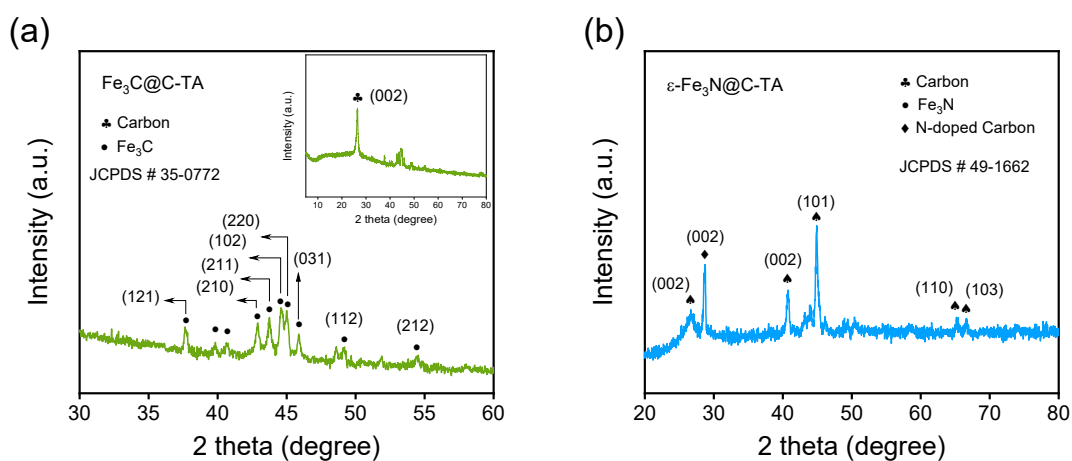

**Figure S11.** XRD spectra showing the phase-pure synthesis of (a)  $\text{Fe}_3\text{C}@C\text{-TA}$  and (b)  $\text{Fe}_3\text{C}@C\text{-TA}$  via catalyst portfolio.

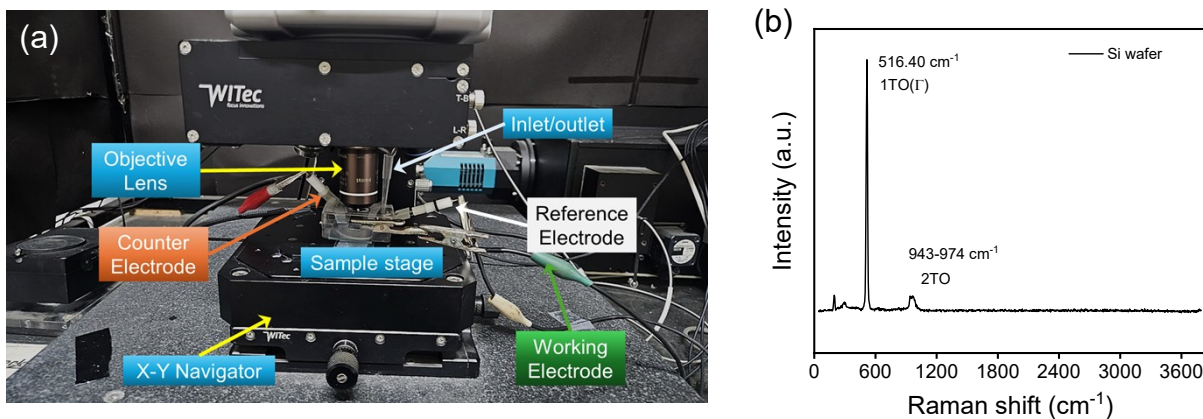

**Figure S12.** (a) Custom-designed *in situ* Raman set up and (b) The Si(100) wafer taken for Raman peak calibration; 1TO( $\Gamma$ ) peak at  $516.40 \text{ cm}^{-1}$  confirms accuracy and reference of spectrometer.

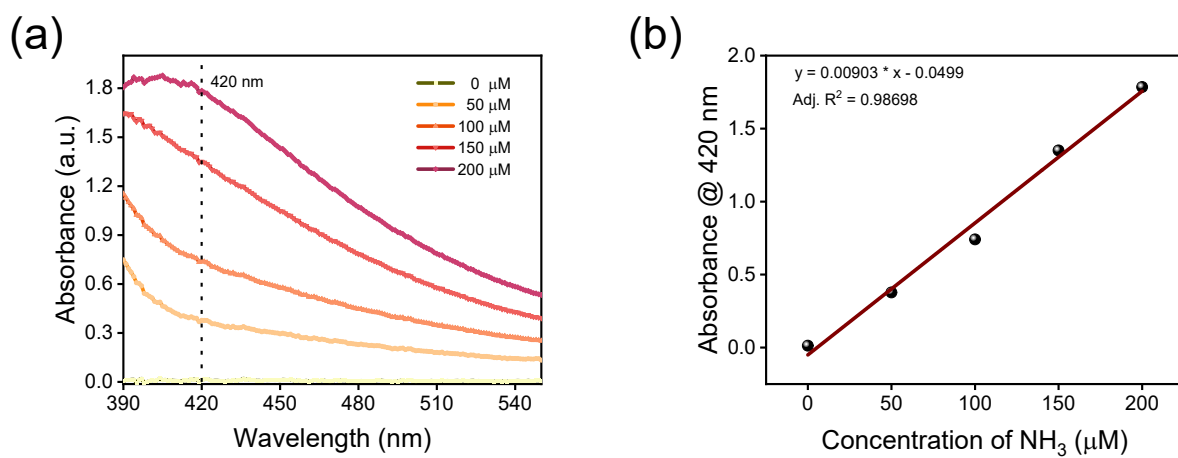

**Figure S13.** UV-visible spectrophotometric calibration curve of  $\text{NH}_4\text{Cl}$  for  $\text{NH}_3$  quantification using Nessler's reagent.

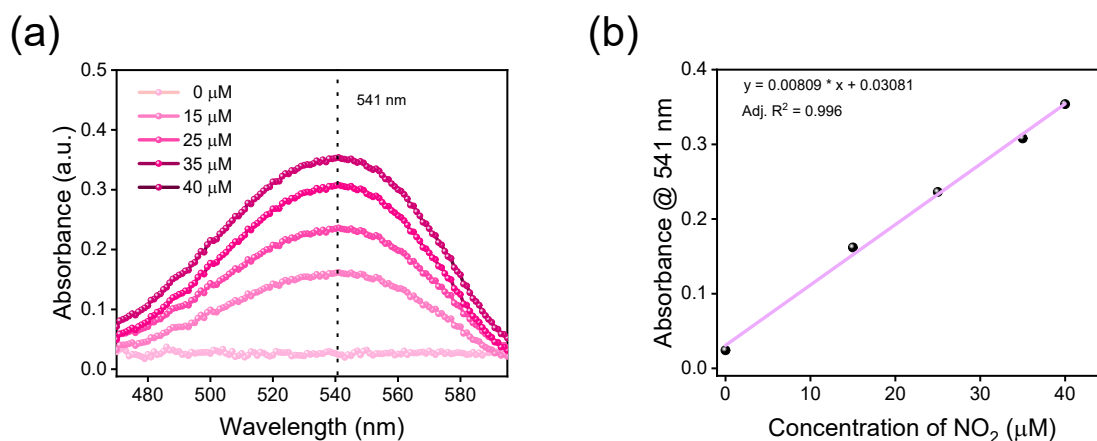

**Figure S14.** UV-visible spectrophotometric calibration curve of KNO<sub>2</sub> for NO<sub>2</sub><sup>-</sup> quantification using Griess reagent.

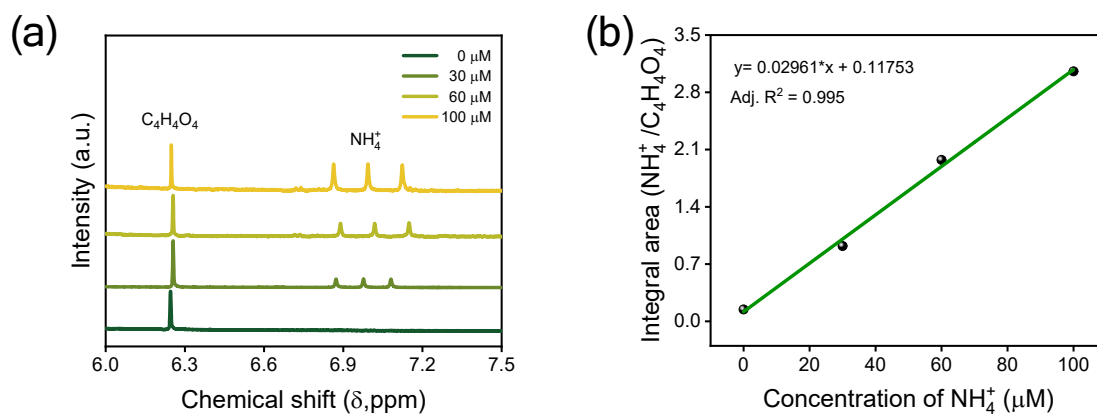

**Figure S15.** <sup>1</sup>H-NMR spectrophotometric calibration curve of NH<sub>4</sub>Cl for NH<sub>4</sub><sup>+</sup> quantification.
